# Supplementary material for: G-triplex based molecular beacon with duplex-specific nuclease amplification for the specific detection of microRNA
Source: Royal Society of Chemistry journal article supplement (doi:10.1039/c9an01075k), 2019-01-01
Supplement: c9an01075k1.pdf [file c9an01075k1.pdf]

## Supporting Information

# G-triplex based molecular beacon with duplex-specific nuclease amplification for specific detection of microRNA

Zhifang Wu, Hui Zhou\*, Juan He, Mei Li, Xiaoming Ma, Jun Xue, \* Xun Li\* and Xiaolin Fan

College of Chemistry and Chemical Engineering, Gannan Normal University, Ganzhou 341000, China.

## 1. Experimental Section

**Table S1.** Sequences of miRNA and DNA probes used in this work

| Name         | Sequence (5'-3')                                                            |
|--------------|-----------------------------------------------------------------------------|
| MBG3-141     | TTGGGTAGG <u>GCGGG</u> TTA TCT TTA CCA GAC AGT GTT <u>CCCGC</u>             |
| MBG3-141-7   | TTGGGTAGG <u>GCGGGTT</u> TTA TCT TTA CCA GAC AGT GTT <u>AACCCGC</u>         |
| MBG3-141-9   | TTGGGTAGG <u>GCGGGTTCA</u> TTA TCT TTA CCA GAC AGT GTT <u>TGAACCCGC</u>     |
| MBG4-141     | TGGGTAGG <u>GCGGG</u> TTGGG TTATCTTTACCAGACAGTGTT <u>CCCGC</u>              |
| MBG4-141-7   | TGGGTAGG <u>GCGGG</u> TT GGG TTA TCT TTA CCA GAC AGT GTT <u>AACCCGC</u>     |
| MBG4-141-9   | TGGGTAGG <u>GCGGG</u> TT GGG TTATCTTTACCAGACAGTGTT <u>CCAACCCGC</u>         |
| MBG3-141-F   | FAM-TTGGGTAGG <u>GCGGG</u> TTA TCT TTA CCA GAC AGT GTT <u>CCCGC</u> -Dabcyl |
| Taqman probe | FAM- <u>AGGGACGGG</u> CCA TCT TTA CCA GAC AGT GTT A -BHQ1                   |
| miRNA-141    | U AAC ACU GUC UGG UAA AGA UGG                                               |
| SmiRNA-141   | U AAC ACU GUC UAG UAA AGA UGG                                               |
| SmiRNA2-141  | U AAC ACU AUC UGG UAA AGA UGG                                               |
| miRNA-200a   | U AAC ACU GUC UGG UAA CGA UGU                                               |
| miRNA-200b   | U AAU ACU GCC UGG UAA UGA UGA                                               |
| miRNA-429    | U AAU ACU GUC UGG UAA AAC CGU                                               |
| miRNA-21     | U AGC UUA UCA GAC UGA UGU UGA                                               |
| miDNA        | T AAC ACT GTC TGG TAA AGA TGG                                               |

The underlined fragments of MBG3 and MBG4 can self-hybridize into hairpin structure, and their bold fragment can self-assemble into G-quadruplex and G-triplex. SmiRNA-141 and SmiRNA2-141 carry a single-base mismatch from miRNA-141, and the mismatched position is marked in red.

## 2. Supplementary results

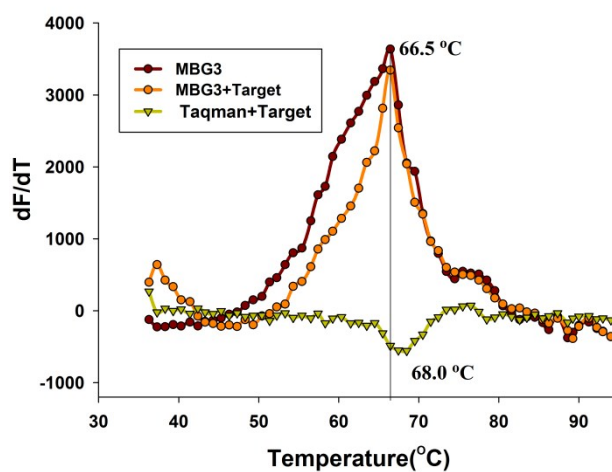

**Fig. S1** Melting curves of MBG3, double-strand MBG3/target and Taqman probe/target duplexes. Melting curves study was carried out on an Agilent StrataGene Mx3005P Realtime PCR instrument. Herein, MBG3 and target were MBG3-141-F and miRAN-141, respectively. All the melting curves are around 67 °C which are higher than the working temperature of DSN (60 °C).

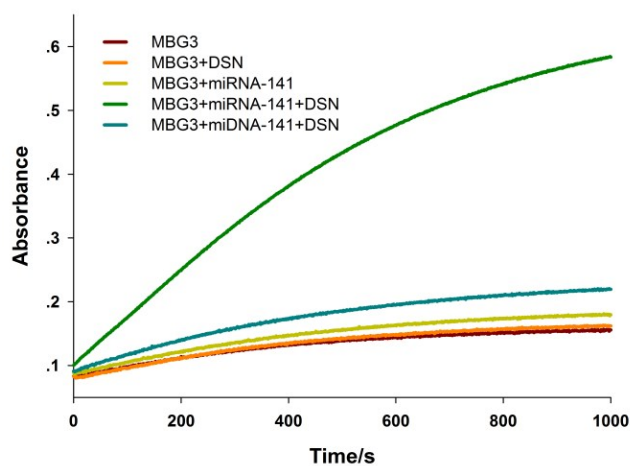

**Fig. S2** Peroxidase activity of MBG3 DSN SA assay. The reaction sample (20  $\mu$ L) containing MBG3, target miRNA-141 and DSN was incubated in 1 $\times$ DSN master buffer at 60 °C for 40 min, and then 60  $\mu$ M hemin was added and incubated for 2 h in buffer (20 mM HEPES, pH = 7.4, 20 mM KCl, 200 mM NaCl, 150 mM NH<sub>4</sub>Cl and 0.01% TritonX-100). After adding of ABTS and H<sub>2</sub>O<sub>2</sub>, the detection was then performed by a Shimadzu UV-2700 UV-vis spectrophotometer. The final concentration of MBG3, miRNA, DSN, hemin, ABTS and H<sub>2</sub>O<sub>2</sub> were 100 nM, 25 nM, 0.2 U, 500 nM, 2 mM and 2 mM, respectively.

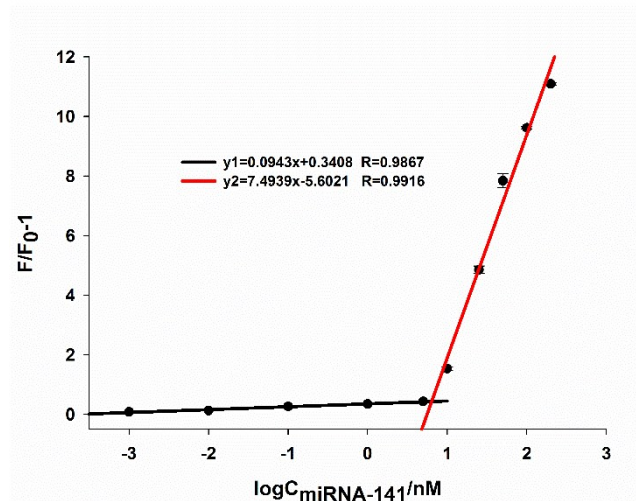

**Fig.S3** The relationship between the fluorescence response and the logarithm of miRNA-141 concentration. Error bars are standard deviation of more than three repetitive experiments. A linear curve fitted a regression equation of  $y_1=0.0943x(\text{nM})+0.3408$  in the range from 1pM to 5 nM. The point at which this line crossed the ordinate axis was taken as the detection limit and equaled approximately 0.25 pM miRNA-141.

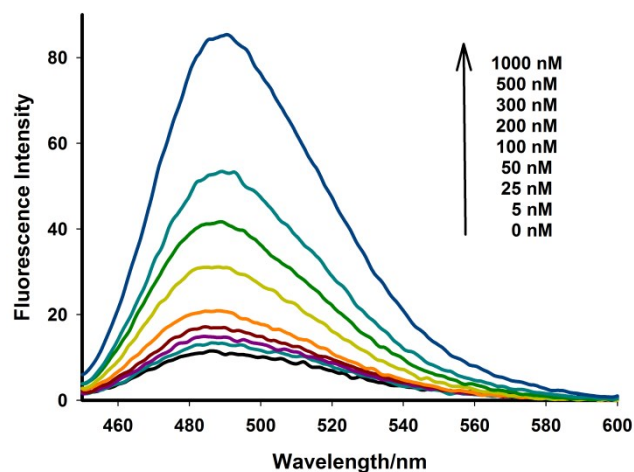

**Fig. S4** Fluorescence emission spectra of MBG3 for different concentrations of miRNA-141.

**Tab. S2** Comparison of analytical performance of various methods for determination of miRNA.

| Method                                          | Sensitivity                     | Selectivity                                                        | Simplicity             | ref                                                 |    |
|-------------------------------------------------|---------------------------------|--------------------------------------------------------------------|------------------------|-----------------------------------------------------|----|
| EXPAR                                           | 16 fM                           | It is difficult to distinguish mutated base located in the middle. | label free             | s1                                                  |    |
| Northern blotting with LNA probe                | 0.5 fM                          | two-base differences                                               | multi-step             | s2                                                  |    |
| Exonuclease III-aided target recycling strategy | 10 pM                           | three -base differences                                            | fluorescence modified  | s3                                                  |    |
| DSN                                             | Taqman probe                    | 0.1 pM                                                             | four -base differences | fluorescence modified                               | s4 |
|                                                 | ssDNA probe                     | 1 pM                                                               | four -base differences | label free                                          | s5 |
|                                                 | G4 based MB probe(colorimetric) | 20 pM                                                              | - <sup>a</sup>         | label free, high background                         | s6 |
|                                                 | G4 based MB probe(fluorescence) | 1 pM                                                               | one-base difference    | fluorescence modified, low background               | s7 |
|                                                 | 2-OMe-RNA MB probe              | 0.5 pM                                                             | one-base difference    | 2-OMe-RNA and fluorescence modified, low background | s8 |
|                                                 | MB probe with short stem        | 5 pM                                                               | one-base difference    | fluorescence modified, low background               | s9 |
|                                                 | This work                       | 1 pM                                                               | one-base difference    | label free, low background                          |    |

<sup>a</sup>“-”represents the data are not available.

**Table S3.** Recovery experiments of miRNA-141 spiked in human urine and HeLa cell lysates<sup>a</sup>.

| Sample      | Added (nM) | Assayed (nM) | Recovery (%) | RSD (%) |
|-------------|------------|--------------|--------------|---------|
| Human urine | 5.00       | 4.65         | 93           | 5.2     |
|             | 25.00      | 25.20        | 102          | 2.7     |
|             | 50.00      | 49.50        | 99           | 0.41    |
| HeLa        | 5.00       | 4.87         | 97           | 2.2     |
|             | 25.00      | 22.59        | 90           | 1.4     |
|             | 50.00      | 49.62        | 99           | 1.3     |

<sup>a</sup> The HeLa (human cervical cancer cell lines with low level expression of miRNA-141) cells were obtained from the Type Culture Collection of the Chinese Academy of Sciences (Shanghai, China). We cultured them in DMEM medium supplemented with 10% fetal bovine serum (FBS) at 37 °C under a humidified 5% CO<sub>2</sub> atmosphere. HeLa cells (~3×10<sup>7</sup> cells) were collected and washed twice with PBS (137 mM NaCl, 2.7 mM KCl, 10 mM phosphate, pH 7.4). Then, 500 μL RIPA lysis buffer (Beyotime, China, cat no P0013C) was added and incubated for 40 min on ice, and then centrifuged at 12000 rpm for 20 min at 4 °C. The Healthy human urine was obtained from Dongguan Tungwah Hospital. We spiked different concentrations of miR-141 into 10-fold diluted blood serum and cell lysate, and monitored them in MBG3 DSN SA assay. All values were obtained as the average of 3~5 repetitive determinations plus standard deviation.

## 2. References

- s1 C. Shi, Q. Liu, C. Ma and W. Zhong, *Anal. Chem.*, 2013, **86**, 336-339.
- s2 É. Várallyay, J. Burgyán and Z. Havelda, *Nat. Protoc.*, 2008, **3**, 190-196.
- s3 F. X. Xiaolei Zuo, Yi Xiao and Kevin W. Plaxco, *J. Am. Chem. Soc.*, 2010, **132**, 1816-1818.
- s4 B. C. Yin, Y. Q. Liu and B. C. Ye, *J Am Chem Soc*, 2012, **134**, 5064-5067.
- s5 L. Yan, Y. Yan, L. Pei, W. Wei and J. Zhao, *Sci. Rep.*, 2014, **4**, 7400.
- s6 T. Tian, H. Xiao, Z. Zhang, Y. Long, S. Peng, S. Wang, X. Zhou, S. Liu and X. Zhou, *Chem. Eur. J.*, 2013, **19**, 92-95.
- s7 H. Zhou, C. Yang, H. Chen, X. Li, Y. Li and X. Fan, *Biosens. Bioelectron*, 2017, **87**, 552-557.
- s8 X. Lin, C. Zhang, Y. Huang, Z. Zhu, X. Chen and C. J. Yang, *Chem. Commun.*, 2013, **49**, 7243.
- s9 J. Z. Y. Li, J. Zhao, L. Zhao, Y. Cheng and Z. Li, *Analyst*, 2016, **141**, 1071-1076.
